# Supplementary material for: Endogenous intrahepatic IFNs and association with IFN-free HCV treatment outcome
Source: JCI journal article supplement (doi:10.1172/jci75938), 2014-07-01
Supplement: sd3 [file 3]

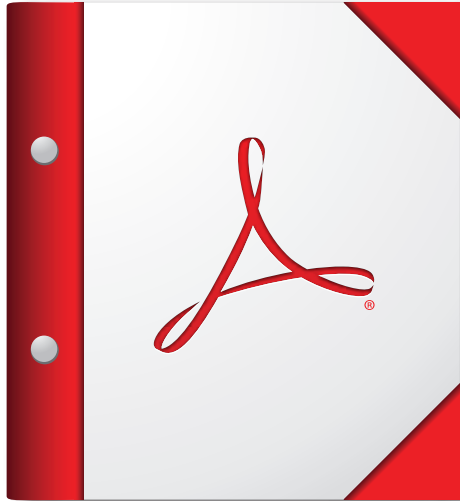

**For the best experience, open this PDF portfolio in  
Acrobat X or Adobe Reader X, or later.**

[Get Adobe Reader Now!](#)
